# Supplementary material for: Sanguisorba officinalis L. Suppresses Triple-Negative Breast Cancer Metastasis by Inhibiting Late-Phase Autophagy via Hif-1α/Caveolin-1 Signaling
Source: PubMed Central journal article supplement (PMC7768086; doi:10.3389/fphar.2020.591400), 2020-12-14

**Figure 2C**

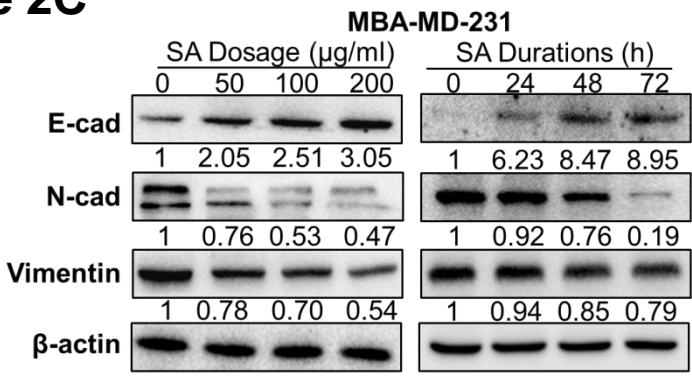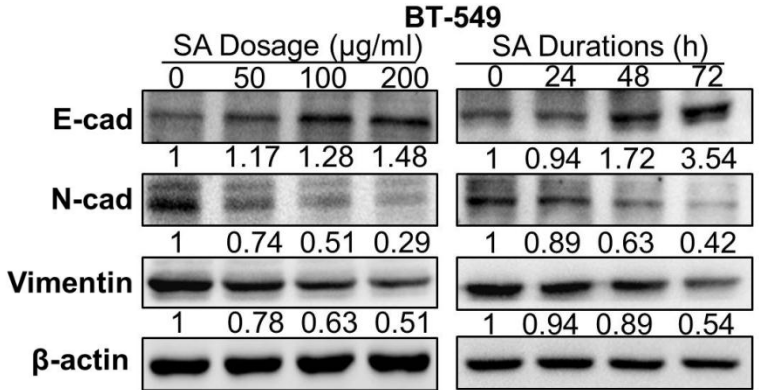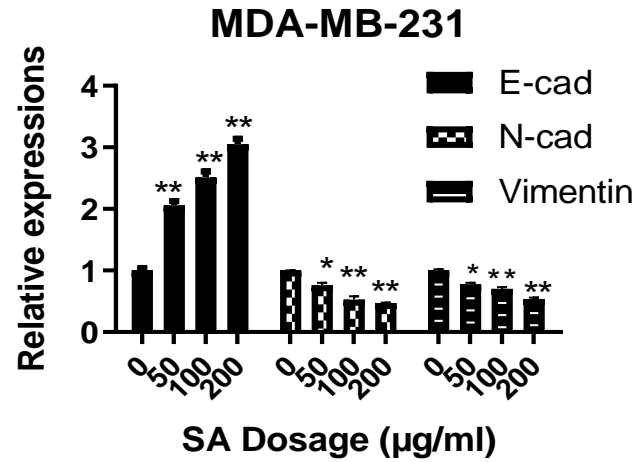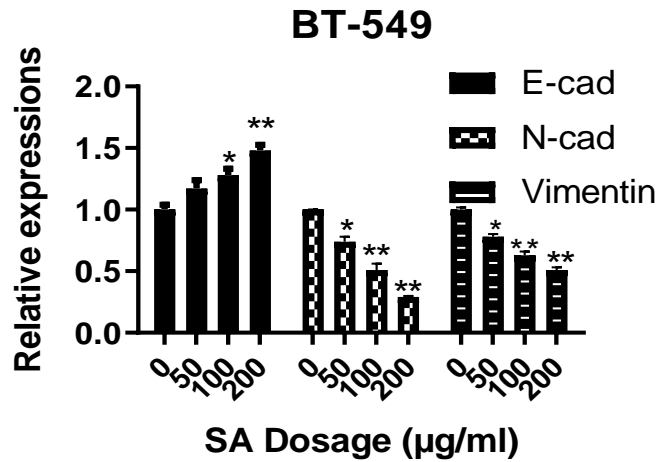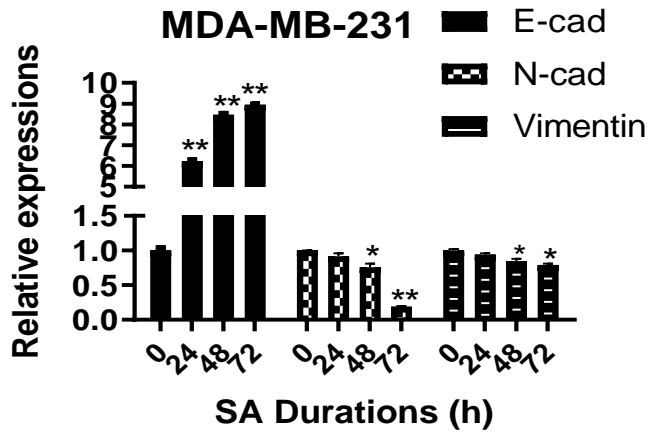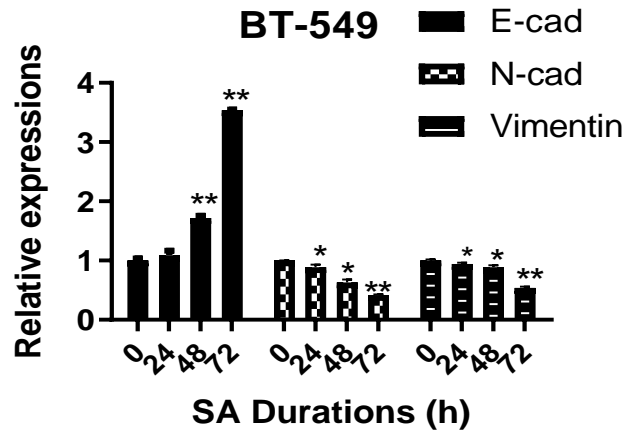

Figure 7C

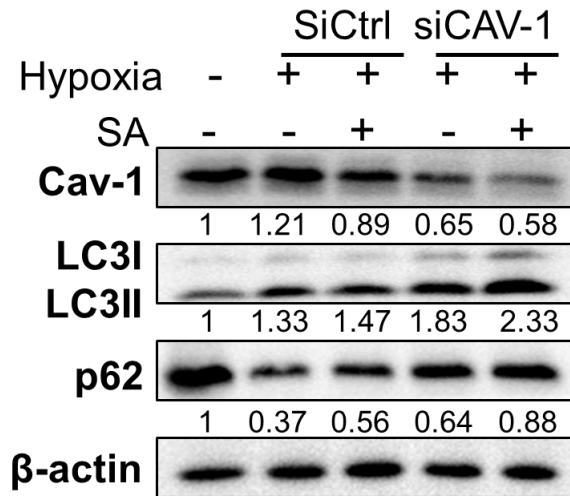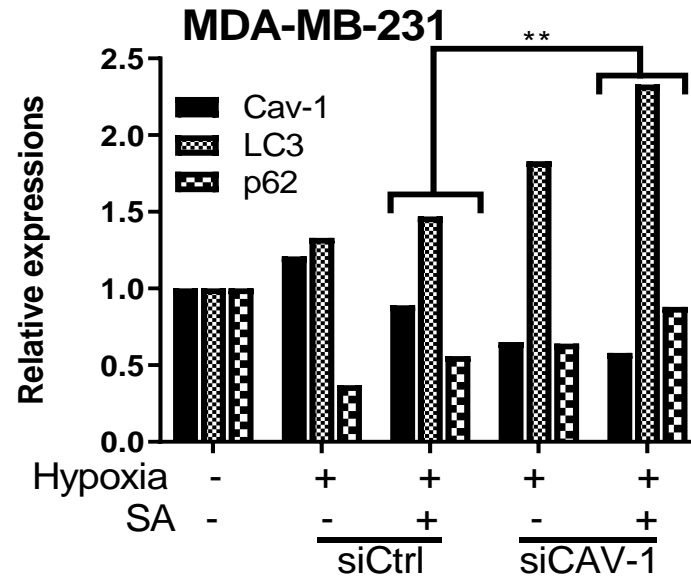

**Figure 8A**

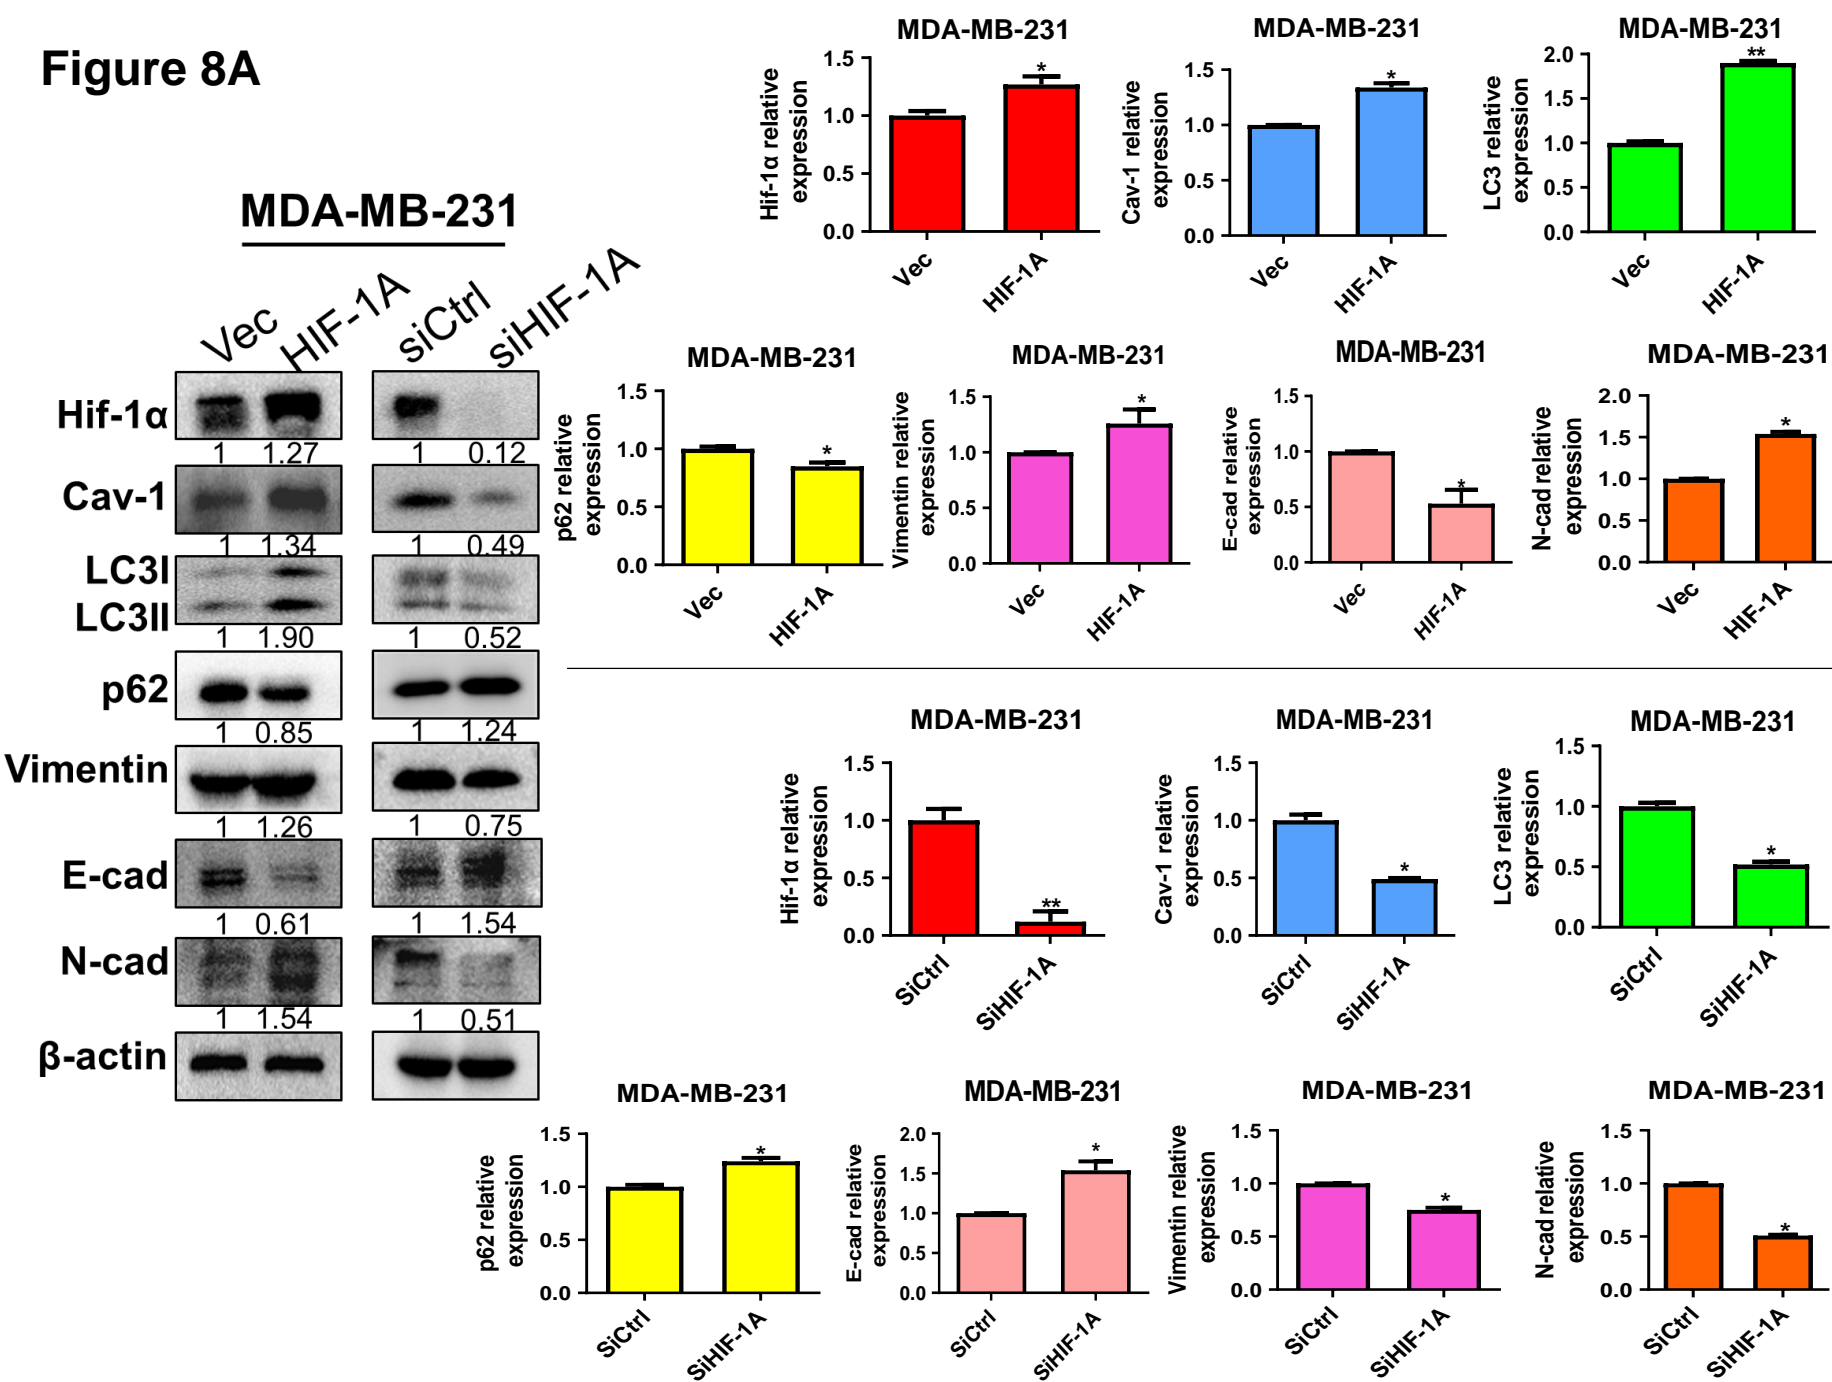

**Figure 8C**

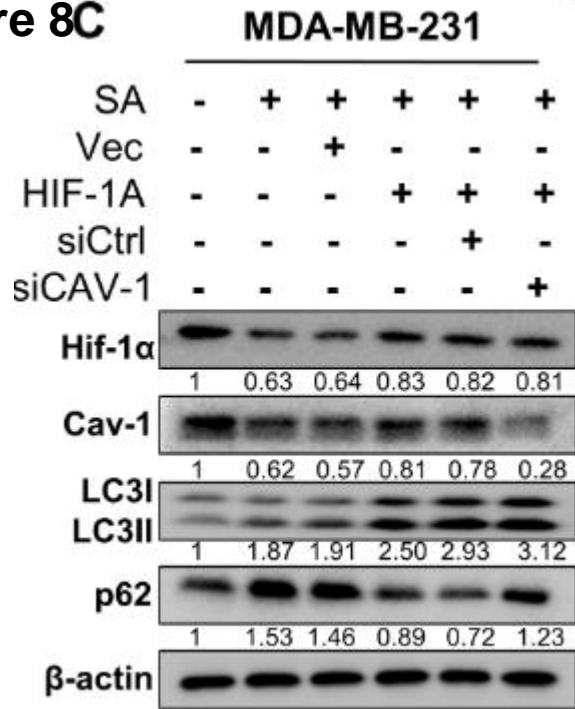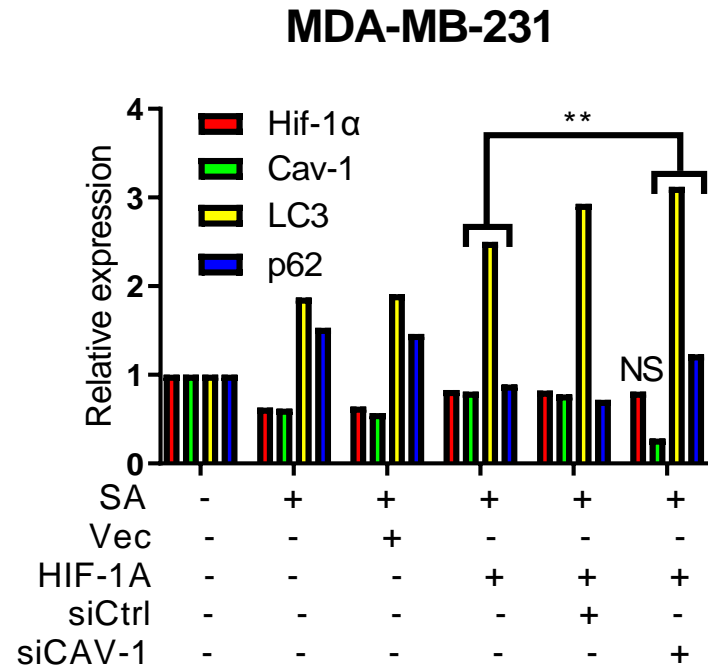

**Figure 9E**

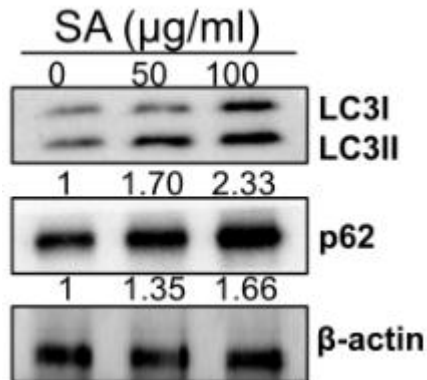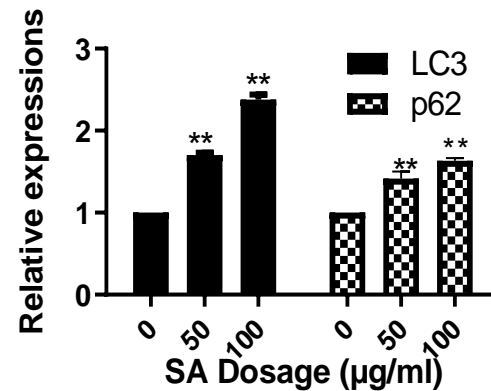

Supplement: datasheet1.pdf [file datasheet1.pdf]
